# Supplementary material
Source: Springer Nature journal article supplement (https://www.springermedizin.de/resource/supplementary/12906_2013_1788_MOESM2_ESM.pdf/9522840)

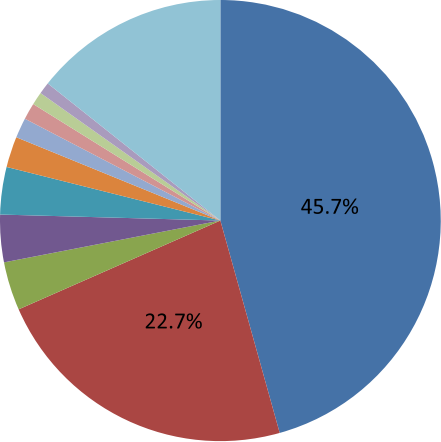

ICD-10 (WHO)

1- R05(45.7%)

2- J00(22.7%)

3- Z29.9(3.6%)

4- J06.9(3.5%)

5- K52.9(3.5%)

6- R07.0(2.3%)

7- J32.9(1.5%)

8- J40(1.2%)

9- L20.8(1.0%)

10- R10.4(0.9%)

The others(14.3%)

Supplement: MOESM2 [file 9522840]
